# Supplementary material
Source: PubMed Central journal article supplement (PMC6283671)
Supplement: NIHMS994044-supplement-Supplementary_Appendix.pdf [file NIHMS994044-supplement-Supplementary_Appendix.pdf]

# Supplementary Appendix

This appendix has been provided by the authors to give readers additional information about their work.

## Contents

|                                                                                                                     |           |
|---------------------------------------------------------------------------------------------------------------------|-----------|
| <b>eFigure 1. OMT Algorithm.....</b>                                                                                | <b>2</b>  |
| <b>eTable 1. Strategies to minimize contrast induced acute kidney injury after cardiac catheterization/PCI.....</b> | <b>3</b>  |
| <b>eTable 2. Strategies to minimize acute kidney injury after CABG .....</b>                                        | <b>4</b>  |
| <b>eTable 3. Schedule of Follow-Up.....</b>                                                                         | <b>5</b>  |
| <b>eTable 4. Definitions of Clinical Endpoints .....</b>                                                            | <b>7</b>  |
| <b>eTable 5. Committee Members and Key Personnel .....</b>                                                          | <b>14</b> |
| <b>eTable 6. Site Listing.....</b>                                                                                  | <b>17</b> |

eFigure 1. OMT Algorithm

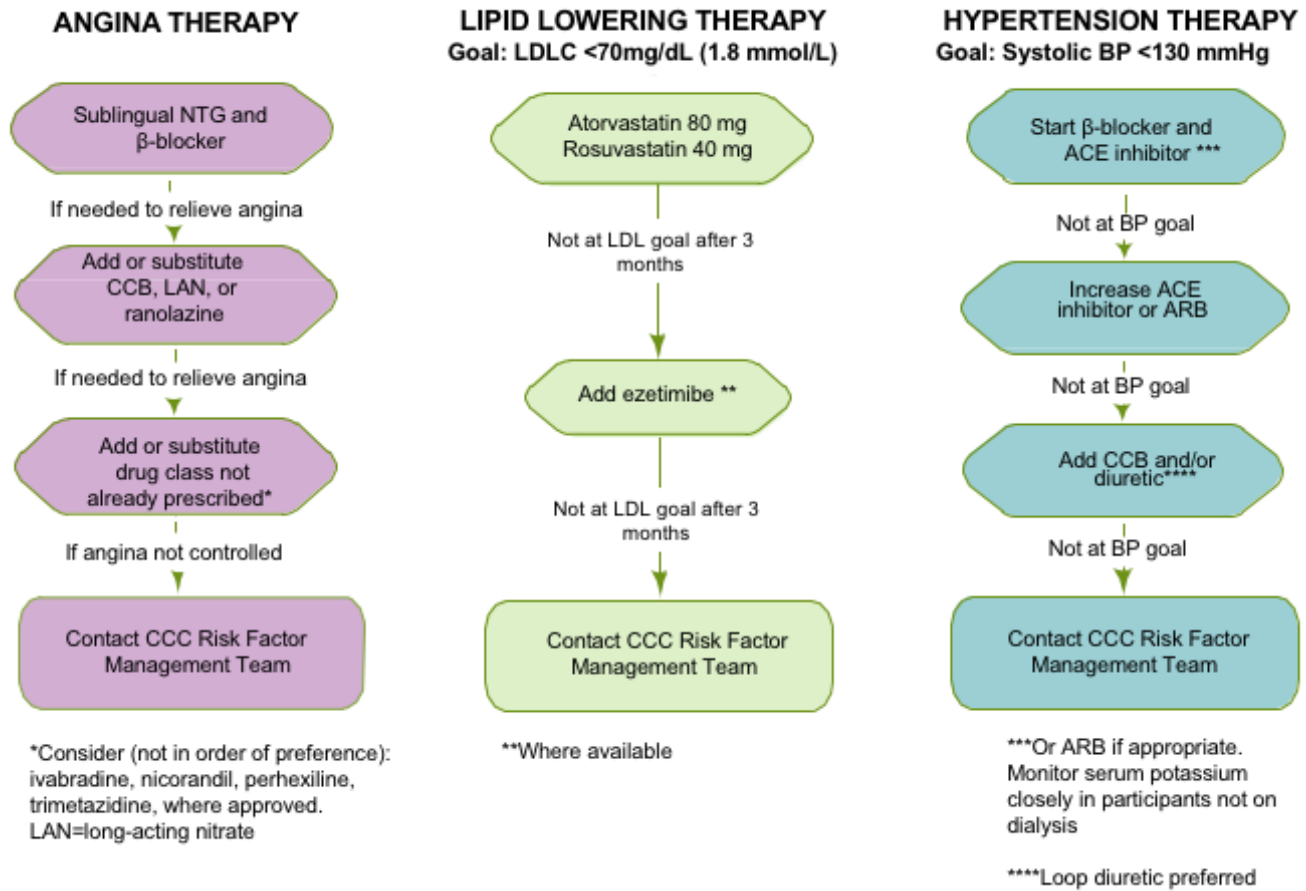

**eTable 1. Strategies to minimize contrast induced acute kidney injury after cardiac catheterization/PCI**

---

- Pre-, intra- and post-procedure hydration
  - Protocol used in the POSEIDON trial:
    - Initiate 3mL/kg/h of normal saline (NaCl 0.9%) IV, for at least 1 hour prior to angiography
    - Measure LVEDP prior to contrast administration
    - Adapt infusion rate based on LVEDP measurement as follows:
      - 5 mL/kg/hr for LVEDP < 13 mm Hg
      - 3 mL/kg/hr for LVEDP of 13 mm Hg to 18 mm Hg
      - 1.5 mL/kg/hr for LVEDP > 18 mm Hg
    - Continue fluid administration for 4 hours post procedure
  - Simplified protocol based on LVEF (expert opinion):
    - Participants with preserved EF
      - IV 0.9% NS at 1 cc/kg/hour for 12 hours pre- and post-procedure
  - Participants with EF < 40%
    - IV 0.45% NS at cc/cc replacement (urine output should be match to maintain euvolemic state) for 12 hours pre- and post-procedure
- Pre-procedure high dose statins
- Avoid nephrotoxic agents for at least 48 hours prior
- Use iso- or low-osmolar contrast agents
- Limit contrast used: Ultra-low/Zero volume contrast techniques (IVUS guided PCI)
  - Use small diameter catheters (i.e., 5–6 French) without side-holes
  - All contrast injections require simultaneous cine angiogram, i.e., “no dye without the cine’s eye.”
  - Limit the volume of contrast injected from the catheter to 1–2 cm<sup>3</sup> per injection using a 3-cm<sup>3</sup> syringe.
  - During PCI, prior to exchange of devices such as balloon catheters, remove contrast from the guide catheter by back bleeding contrast out of the “Y” connector.
  - If available, display previous angiographic images (including angiography from past procedures) alongside active fluoroscopy screen as a reference to use as guidance during guide wire, balloon, stent and ultrasound passage.
  - Absolutely no contrast “puffing”/test injections during the procedure.
  - Use IVUS liberally for pre-PCI assessment of the lesion, selection of therapeutic modalities, and post-PCI result assessment.
  - Avoid ventriculography
  - Use of biplane if available
- Consider ischemia-guided revascularization
- Consider staged PCI for complex multivessel disease

---

IV= intravenous; IVUS= intravascular ultrasound; LVEDP= left ventricular end diastolic pressure; LVEF= left ventricular ejection fraction; PCI= percutaneous coronary intervention

## **eTable 2. Strategies to minimize acute kidney injury after CABG**

---

Consider delay of surgery  $\geq 7$  days from time of cardiac catheterization

Use of off pump CABG may be reasonable

Renally dose all medications

In patients undergoing on pump CABG, maintain perioperative hematocrit  $> 19\%$  and mean arterial pressure  $> 60$  mmHg

---

CABG= coronary artery bypass graft surgery

**eTable 3. Schedule of Follow-Up**

Schedule of Study Assessments and Procedures (Protocol Date: Jan. 06.2014)

|                                                                  | Screening visit | Randomization visit (Baseline Visit) | Catheterization & PCI or CABG | Follow up                    |                            |                            |                             |                             |                |                             |                             |                            |
|------------------------------------------------------------------|-----------------|--------------------------------------|-------------------------------|------------------------------|----------------------------|----------------------------|-----------------------------|-----------------------------|----------------|-----------------------------|-----------------------------|----------------------------|
|                                                                  |                 |                                      |                               | 1.5m <sup>A</sup><br>Visit 1 | 3m <sup>A</sup><br>Visit 2 | 6m <sup>B</sup><br>Visit 3 | 12m <sup>A</sup><br>Visit 4 | 18m <sup>B</sup><br>Visit 5 | 24m<br>Visit 6 | 30m <sup>B</sup><br>Visit 7 | 36m <sup>C</sup><br>Visit 8 | Frequency beyond 36 months |
| Eligibility screen                                               | X               |                                      |                               |                              |                            |                            |                             |                             |                |                             |                             |                            |
| Informed consent (including biorepository consent if applicable) | X               |                                      |                               |                              |                            |                            |                             |                             |                |                             |                             |                            |
| Creatinine and pregnancy test <sup>D</sup>                       | X               |                                      |                               |                              |                            |                            |                             |                             |                |                             |                             |                            |
| Medical History/Medical Status                                   | X               | X                                    |                               | X                            | X                          | X                          | X                           | X                           | X              | X                           | X                           | Q6m                        |
| Cardiovascular medications                                       | X               | X                                    |                               | X                            | X                          | X                          | X                           | X                           | X              | X                           | X                           | Q6m                        |
| NYHA* and CCS class**                                            | X               | X                                    |                               | X                            | X                          | X                          | X                           | X                           | X              | X                           | X                           | Q6m                        |
| Release for medical records signed                               |                 | X                                    |                               |                              |                            |                            | X                           |                             | X              |                             | X                           | Q12m                       |
| Safety assessment <sup>G</sup>                                   |                 |                                      | X                             |                              |                            |                            |                             |                             |                |                             |                             |                            |
| Vital signs, w eight, height <sup>H</sup>                        |                 | X                                    |                               | X                            | X                          | X                          | X                           | X                           | X              | X                           | X                           | Q12m                       |
| Standard lab results <sup>I</sup>                                |                 | √                                    |                               |                              | X                          | X                          | X                           | X                           | X              | X                           | X                           | Q12m                       |
| Biorepository blood draw                                         |                 | X                                    |                               |                              | √                          |                            |                             |                             |                |                             |                             |                            |
| Cardiac biomarkers <sup>L</sup>                                  |                 |                                      | X                             |                              |                            |                            |                             |                             |                |                             |                             |                            |
| Electrocardiogram (ECG) <sup>M</sup>                             |                 | X                                    | √ <sup>N</sup>                |                              |                            |                            | X                           |                             | X              |                             |                             | @ closeout                 |
| Lifestyle Assessment (PACE) <sup>***</sup>                       |                 | X                                    |                               |                              | X                          |                            | X                           |                             | X              |                             | X                           | Q12m                       |
| Lifestyle Counseling (PACE) <sup>***</sup>                       |                 | X                                    |                               | X                            | X                          | X                          | X                           | X                           | X              | X                           | X                           | Q6m                        |
| Morisky Green Levine Medication Adherence                        |                 | X                                    |                               |                              |                            | X                          | X                           | X                           | X              | X                           | X                           | Q6m                        |
| Brief symptoms/QOL assessment <sup>P</sup>                       |                 | X                                    |                               | X                            | X                          | X                          | X                           | X                           | X              | X                           | X                           | Q6m                        |
| Initiate Optimal Medical Therapy (OMT)                           |                 | X                                    |                               |                              |                            |                            |                             |                             |                |                             |                             |                            |
| Medical Therapy Evaluation and Optimization <sup>Q</sup>         |                 |                                      |                               | X                            | X                          | X                          | X                           | X                           | X              | X                           | X                           | Q6m                        |
| Schedule catheterization for INV participants <sup>R</sup>       |                 | X                                    |                               |                              |                            |                            |                             |                             |                |                             |                             |                            |
| Hospitalization assessment                                       |                 |                                      |                               | X                            | X                          | X                          | X                           | X                           | X              | X                           | X                           | Q6m                        |
| Endpoint assessment                                              |                 |                                      | X                             | X                            | X                          | X                          | X                           | X                           | X              | X                           | X                           | Q6m                        |

Follow-up visits will be scheduled based on time since the date of randomization (baseline).

\*NYHA- New York Heart Association \*\*CCS- Canadian Cardiovascular Society \*\*\*PACE- Patient-centered Assessment and Counseling for Exercise and nutrition (PACE) assessment and counseling

---

<sup>A</sup> 1.5, 3, and 12 month visits should be in clinic visits, depending on participant stability, risk factor control, and geography.

<sup>B</sup> 6, 18, and 30 month visits may be via telephone, email, or in clinic depending on participant stability, risk factor control, and geography.

<sup>C</sup> Following the 36 month visit, follow-up visits should be in clinic visits at least every 12 months. Clinic visits can be replaced by email or phone depending on participant stability, risk factor control, and geography.

<sup>D</sup> Creatinine if not done within 90 days and pregnancy test if premenopausal.

<sup>F</sup> CCTA not performed if estimated glomerular filtration rate < 60ml/min (unless requested by the treating physician) and not performed in other selected participants (see

<sup>G</sup> Safety Assessment (refer to section 13.4).

<sup>H</sup> Height is only needed at randomization, assessments only required if visit is completed in clinic.

<sup>I</sup> Required labs include: lipids (preferably fasting) at 3 month visit then semiannually only, and HbA1c (at visit 4, 6, 8 and annually thereafter for diabetic participants.

These lab

results will be requested from the participant's physician. If these results are not available they should be obtained by either the participant's treating physician or study staff. Creatinine values obtained clinically for participants with eGFR <60 at the three month follow-up visit and annually will also be recorded.

<sup>J</sup> Additional lab required at randomization includes complete blood count Request from participant's physician, since it is expected that routine blood work will have been done within the last 6 months

<sup>K</sup> May be requested.

<sup>L</sup> For participants undergoing PCI: troponin and CK-MB pre-procedure and at 8-16 ± 2 hours post-PCI or at hospital discharge, whichever comes earlier. For participants undergoing CABG: troponin and CK-MB pre-procedure and at 18 ± 6 hours post-CABG. All biomarker measurements should be recorded on eCRF. A biomarker measurement should be obtained before and after all PCI and CABG procedures, whenever possible.

<sup>M</sup> Send to ECG core lab; ECG required for all cardiac admissions and revascularizations; year 1 ECG optional (filed on site) and closeout.

<sup>N</sup> ECG done following procedure (60±30 mins post-PCI, 3 days post-CABG).

<sup>O</sup> Seattle Angina Questionnaire/Duke Activity Status Index/Rand general health status item/Perceived Stress Scale/Patient Health Questionnaire/Life Orientation Test – Revised/EQ-5D/Demographic characteristics. Not required for the ISCHEMIA CKD ancillary trial.

<sup>P</sup> Selected Seattle Angina Questionnaire/Rose dyspnea scale/EQ-5D.

<sup>Q</sup> At every follow-up visit the research team, in collaboration with the treating physician(s), will evaluate effectiveness of medical therapy and optimize as needed according to guideline recommendations and study algorithms.

<sup>R</sup> Planned cath and revascularization only in the INV group. See MOO for time windows for performing cath and revascularization after randomization. Catheterization and optimal revascularization treatment should be targeted within 30 days after randomization in the Invasive strategy group. In the Conservative group, catheterization and optimal revascularization is reserved for participants with refractory angina symptoms or acute ischemic events.

## eTable 4. Definitions of Clinical Endpoints

### **Death**

All deaths will be adjudicated and classified as cardiovascular, non- cardiovascular or undetermined. Cardiovascular deaths are defined as all deaths excluding those for which the principal and underlying cause is solely non-cardiovascular. Any death for which a cardiovascular contributing cause is suspected will also be considered a cardiovascular death.

### **Myocardial Infarction**

Two versions of MI will be adjudicated in ISCHEMIA-CKD: a primary definition and secondary definition. Each definition includes a hierarchy of markers and threshold values as well as a set of rules for diagnosing MI when one or more key elements of the medical record are missing.

The Primary Definition is based upon the Universal Definition of MI, but relies upon site- reported MI decision limits for troponin (which may or may not be the same as the manufacturer 99%URL), and has selected unique marker criteria for MI after PCI or CABG (Type 4a, 5).

The Secondary Definition is also based upon the Universal Definition of Myocardial Infarction, but specifically uses the 99%URL from the assay manufacturer's package insert (which may or may not be the site's MI decision limit) and uses the same supporting criteria (eg. angiographic and ECG) as the UMI definition.

All MI events will be classified based on the Universal MI classification system as follows:

- Type 1: Spontaneous MI
- Type 2: Secondary MI
- Type 3: Sudden Death MI
- Type 4a: MI related to PCI
- Type 4b: MI related to stent thrombosis
- Type 4c: MI related to stent restenosis
- Type 5: MI related to CABG
- Silent MI

### ***Spontaneous MI (Types 1, 2, 4b, 4c)***

Diagnosis of spontaneous MI will be satisfied by a clinical setting consistent with acute myocardial ischemia and any one or more of the following criteria:

Marker elevation, as outlined below and at least 1 of the following:

- Symptoms of ischemia, usually lasting > 20 minutes in duration
- New ischemic ST and/or T wave and/or Q-wave ECG changes, or new LBBB, as described below
- Imaging evidence of new loss of viable myocardium in comparison to the baseline imaging test
- Angiographic evidence of intracoronary thrombus, stent thrombosis (4b) or high- grade in-stent restenosis ( $\geq 50\%$ ) (4c)

Marker data not available and at least 2 of the following:

- New ischemic ST and/or T wave and/or Q-wave ECG changes, or new LBBB, as described below
- Imaging evidence of new loss of viable myocardium in comparison to the baseline imaging test
- Angiographic evidence of intracoronary thrombus.

Autopsy evidence of a fresh myocardial infarction as stand-alone criterion

### ***Spontaneous MI Marker Criteria***

Troponin, including high-sensitivity troponin, is the preferred biomarker and takes precedence over CK-MB for both definitions.

Primary Definition: Preferentially uses a troponin threshold value reported as MI Decision Limit or the Upper Limit of Normal (ULN). Marker elevation is defined as troponin > ULN/MI decision limit. If troponin is not done or not available, then CK-MB > ULN will qualify. If both troponin and CK-MB are not done or not available, then CK > 2 x ULN will qualify.

Secondary Definition: Preferentially uses a troponin threshold reported by the manufacturer, namely, the manufacturer 99th percentile. Marker elevation is defined as troponin > 99th percentile. If the troponin 99th percentile is not reported, then troponin > ULN will qualify. If troponin is not done or not available, then CK-MB > ULN will qualify. If both troponin and CK-MB are not done or not available, then CK > 2 x ULN will qualify.

### ***Spontaneous MI ECG Criteria***

ECG criterion is considered to be met if any of the following:

ST elevation: New ST elevation at the J-point in two contiguous leads with the cutpoints:  $\geq 0.2$  mV in men >age 40 and  $\geq 0.25$  mV in men <40 years or  $\geq 0.15$  mV in women in leads V2–V3 and/or  $\geq 0.1$  mV in other leads, or new LBBB.

Any new Q-wave in leads V2–V3  $\geq 0.02$  seconds or QS complex in leads V2 and V3 or Q-wave  $\geq 0.03$  seconds and  $\geq 0.1$  mV deep or QS complex in leads I, II, aVL, aVF, or V4–V6 in any two leads of a contiguous lead grouping (I, aVL, V6; V4–V6; II, III, and aVF) or R-wave  $\geq 0.04$  seconds in V1–V2 and R/S  $\geq 1$  with a concordant positive T-wave in the absence of a conduction defect.

ST depression and/or T-wave changes, new horizontal or down-sloping ST depression  $\geq 0.05$  mV in two contiguous leads; and/or T-wave inversion  $\geq 0.1$  mV in two contiguous leads. The ST-T wave criteria only apply in the absence of findings that would preclude ECG analysis such as LBBB, LVH with repolarization abnormalities, pre-excitation and pacemakers.

### ***Silent MI***

This event includes evidence of new silent Q-wave MI detected during routine protocol or clinically obtained ECG follow-up. Silent MI events will be classified as a type 1 MI.

### ***Sudden death MI (Type 3)***

MI events in which a presentation consistent with infarction is present but the patient dies before the biomarkers are drawn or within the first few hours of the event before the biomarkers become positive. Sudden unexpected cardiac death, including cardiac arrest, often with symptoms suggestive of myocardial ischemia, accompanied by presumably new ST-segment elevation, or new LBBB, or evidence of fresh thrombus in a coronary artery by angiography and/or at autopsy, but death occurring before blood samples could be obtained, or at a time before the appearance of cardiac biomarkers in the blood.

### ***PCI-Related MI (Type 4a)***

#### **Primary Definition**

CK-MB is the preferred biomarker and takes precedence over troponin. For subjects with normal baseline biomarker level pre-PCI, peri-PCI MI requires a rise in CK-MB to



>5-fold the ULN (or a rise in troponin to >35 times the MI Decision Limit/ULN, when CK-MB is unavailable) within 48 hours post-PCI. If pre-PCI cardiac markers (CKMB or cTn) are elevated, they must be stable or falling as indicated by two samples at least 6 h apart. The post-PCI CKMB level should reflect a rise of >20% over pre-PCI levels. In addition to biomarker criteria, peri-PCI MI requires at least one of the following:

- Post-procedure angiographic TIMI 0/1 flow in a major coronary artery or a side branch with reference vessel diameter  $\geq 2.0$  mm which had TIMI 2-3 flow at baseline, or TIMI 2 flow in a major coronary artery or a side branch with reference vessel diameter  $\geq 3.0$  mm which had TIMI 3 flow at baseline or Type C dissection (NHLBI classification) or greater in the target vessel.
- New ECG changes (ST segment elevation or depression  $>0.1$  mV in 2 contiguous leads), new pathologic Q-waves in  $\geq 2$  contiguous leads, or new persistent LBBB present on a post-PCI ECG obtained at least 30 minutes and up to 48 hours post procedure in the absence of any intervening coronary event between the time of the PCI procedure and the ECG showing changes.

NOTE: A type 4a MI will be diagnosed with a rise in CK-MB to >10-fold the ULN (or when CK-MB is unavailable, a rise in troponin to >70 times the MI Decision Limit/ULN) as a stand-alone criterion. If biomarkers are missing, a type 4a MI will be diagnosed if BOTH ECG criteria (new ST elevation or depression, Q-wave criteria, or new and persistent LBBB) AND angiographic criteria above are present. If pre-PCI cardiac markers are missing, they will be assumed to be normal in those without a preceding event.

### **Secondary Definition**

Elevation of troponin values  $>5 \times$  99th percentile URL within 48 hours post-PCI in patients with normal baseline troponin values pre-PCI AND a rise of troponin values  $>20\%$  if the baseline values are elevated pre-PCI and are stable or falling. If the troponin 99th percentile is not available, the MI Decision Limit / ULN may be used. If troponins are not available, CKMB elevation  $>5 \times$  ULN will be used.

In addition to biomarker criteria, peri-PCI MI requires at least one of the following:

- Symptoms suggestive of myocardial ischemia ( $\geq 20$  min)
- New ischemic ST changes or new pathological Q waves. (see "ECG Criteria" above) Note the UMI definition uses  $\geq 0.05$  mV of STD whereas the ISCHEMIA definition uses  $\geq 0.1$  mV for PCI related ECG criteria
- Angiographic evidence of a flow limiting complication, such as loss of patency of a side branch, persistent slow-flow or no re-flow, embolization, or Type C dissection (NHLBI classification) or greater in the target vessel.
- Imaging evidence of new loss of viable myocardium or new regional wall motion abnormality.

NOTE: A type 4a MI will be diagnosed with a rise in troponin to >70 times the 99th percentile URL (or, when troponin is unavailable, a rise in CK-MB to >10 times the ULN) as a stand-alone criterion. If biomarkers are missing, a type 4a MI will be diagnosed if BOTH ECG criteria (new ST elevation or depression, Q-wave criteria, or new and persistent LBBB) AND angiographic criteria above are present. If pre-PCI cardiac markers are missing, they will be assumed to be normal in those without a preceding event.

### **CABG-Related MI (Type 5)**

#### **Primary Definition**

CK-MB is the preferred serum biomarker and takes precedence over cardiac troponin. For subjects with normal baseline biomarker level pre-CABG, peri-CABG MI requires a rise in CK-MB to >10-fold the ULN (or a rise in troponin to >70 times MI Decision Limit/ULN when CK-MB is

unavailable) within 48 hrs post-CABG. In addition to biomarker criteria, peri-CABG MI requires at least one of the following:

- A new substantial wall motion abnormality by cardiac imaging (CEC assessed), except new septal and apical abnormalities. The CEC will have latitude in determining whether a new wall motion abnormality is “substantial” in the context of the clinical event.
- New pathologic Q-waves in  $\geq 2$  contiguous leads or new persistent LBBB is present on post CABG ECG obtained day 3 post CABG, or hospital discharge, whichever comes earlier in the absence of any intervening coronary event between the time of the CABG procedure and the ECG showing changes.

NOTE: A type 5 MI will be diagnosed with a rise in CK-MB to  $>15$ -fold the ULN (or when CK-MB is unavailable a rise in troponin to  $>100$  times the MI Decision Limit/ULN) as a stand-alone criterion. If biomarkers are missing, an MI will be diagnosed if the ECG criteria (New pathologic Q waves or new persistent LBBB) AND new substantial wall motion abnormality are BOTH present. If pre-CABG cardiac markers are missing, they will be assumed to be normal in those without a preceding event.

### **Secondary Definition**

Elevation of troponin values  $>10$  X 99th percentile URL within 48 hrs post-CABG in patients with normal baseline troponin values ( $\leq$  99th percentile URL). If the troponin 99th percentile is not available, the ULN may be used. If troponins are not available, CKMB elevation  $>10$  X ULN will be used. In addition to biomarker criteria, peri-CABG MI requires at least one of the following:

- New pathologic Q waves or new LBBB
- Angiographic evidence of new graft or new native coronary artery occlusion.
- Imaging evidence of new loss of viable myocardium.

NOTE: A type 5 MI will be diagnosed with a rise in troponin to  $>100$  times the 99th percentile URL (or when troponin is unavailable a rise in CK-MB to  $>15$  times the ULN) as a stand-alone criterion. If biomarkers are missing, an MI will be diagnosed if the ECG criteria (New pathologic Q waves or new persistent LBBB) AND new substantial wall motion abnormality are BOTH present. If pre-CABG cardiac markers are missing, they will be assumed to be normal in those without a preceding event.

### **Complicated MI and Large MI**

*Complicated MI:* Prognostically important MIs may also be identified as those with complications such as hemodynamic instability, cardiogenic shock, drop in EF  $>10\%$  from baseline, electrical instability with life-threatening VT or VF, or heart failure complicating MI. Complicated myocardial infarctions may typically require ICU care, invasive support (eg. intubation, IABP, PA catheters) and intravenous medications (eg. inotropes or antiarrhythmics.) CEC adjudicators will identify complicated MIs based upon the information available to them in the eCRF and source documents.

- Hemodynamic instability: requiring fluids, inotropic or vasopressor support to maintain end-organ perfusion. May progress to shock if also accompanied by end-organ underperfusion.
- Shock: Compromise of end-organ perfusion due to hemodynamic instability and sustained hypotension. Often manifested by hypotension, increased creatinine, shock liver, and decreased mentation.
- Life-threatening VT or VF: Requiring antiarrhythmics or defibrillation to return sinus rhythm. Transient runs of VT (eg. during reperfusion) are not associated with hemodynamic instability are not usually considered life-threatening.
- Decreased EF  $\geq 10\%$ : EF assessment during the event which indicates a drop from prior assessments (eg. EF 30% from previous EF 55%)

- HF in the setting of an MI is defined on the basis of the physician's decision to treat HF with an intravenous (IV) diuretic, IV inotropic agent or IV vasodilator and at least 1 of the following:
  - Presence of pulmonary edema or pulmonary vascular congestion on chest radiograph believed to be of cardiac cause.
  - Rales greater than 1/3 up the lung fields believed to be due to HF.
  - Pulmonary Capillary Wedge Pressure (PCWP) or left ventricular end diastolic pressure (LVEDP) greater than 18 mmHg.
  - Dyspnea, with documented paO<sub>2</sub> less than 80 mmHg on room air or O<sub>2</sub> saturation less than 90% on room air, without significant lung disease

*Large MI:* The size of MI will be assessed by examining peak levels of cardiac biomarkers as a continuous function.

### **Hospitalization for Unstable Angina**

Prolonged ischemic symptoms at rest (usually  $\geq 10$  minutes in duration), or accelerating pattern of chest pain that occurs with a lower activity threshold (CCS class III or IV) considered to be myocardial ischemia upon final diagnosis resulting in an unscheduled visit to a healthcare facility resulting in an overnight stay generally within 24 hours of the most recent symptoms, cardiac biomarkers not meeting MI criteria, and at least one of the following:

- New or worsening ST or T wave changes on resting ECG\* (core laboratory assessed)
- Angiographic evidence of a ruptured/ulcerated plaque, or thrombus in an epicardial coronary artery believed to be responsible for the ischemic symptoms/signs (core laboratory assessed).

\*ECG Criteria:

ST segment shifts and T-wave changes: New horizontal or down-sloping ST depression  $\geq 0.05$  mV in two contiguous leads; and/or T inversion  $\geq 0.1$  mV in two contiguous leads, or new ST segment elevation  $\geq 0.1$  mV in 2 contiguous leads. The ST-T wave criteria only apply in the absence of findings that would preclude ECG analysis such as LBBB, LVH with repolarization abnormalities, pre-excitation and pacemakers.

### ***Resuscitated Cardiac Arrest***

Resuscitated cardiac arrest is defined as successful resuscitation for documented cardiac arrest out-of-hospital (or ER) in a patient subsequently admitted to hospital, and then discharged. A patient who is successfully resuscitated but dies before hospital discharge of complications related to the cardiac arrest (e.g., anoxic encephalopathy, septic shock), will be classified as a coronary heart disease death. An uncomplicated procedure-related cardiac arrest with prompt resuscitation and without adverse sequelae will not be counted as an event. Events that meet the MI criteria will be categorized as MI.

### ***Hospitalization for Heart Failure***

While patients may have multiple simultaneous disease processes, for the end point event of heart failure requiring hospitalization, the diagnosis of congestive heart failure would need to be the primary process. Heart failure (HF) requiring hospitalization is defined as an event that meets the following criteria:

- a. Requires hospitalization defined as an admission to an inpatient unit or a visit to an emergency department that result in at least a 24 hour stay (or a date change if the time of admission/discharge is not available).

**AND**

- b. Clinical symptoms of heart failure, including at least one of the following: New or worsening
  - Dyspnea
  - Orthopnea
  - Paroxysmal nocturnal dyspnea
  - increasing fatigue/worsening exercise tolerance

**AND**

- c. Physical signs of heart failure, including at least two of the following:
  1. Edema (> 2+ lower extremity)
  2. Pulmonary rales (pulmonary edema not occurring as the consequence of an arrhythmia in the absence of worsening heart failure. If pulmonary edema complicates acute MI event should be coded as MI)
  3. Jugular venous distension
  4. Tachypnea (respiratory rate > 20 breaths/minute)
  5. Rapid weight gain
  6. S3 gallop
  7. Increasing abdominal distension or ascites
  8. Hepatojugular reflux
  9. Radiological evidence of worsening heart failure
  10. A right heart catheterization within 24 hours of admission showing a pulmonary capillary wedge pressure (pulmonary artery occlusion pressure)  $\geq$  18 mm Hg and/or a cardiac output < 2.2 L/min/m<sup>2</sup>

NOTE: Biomarker results (e.g., brain natriuretic peptide (BNP) > 500 or Pro-NT BNP > 2500) consistent with congestive heart failure will be supportive of this diagnosis, but the elevation in BNP cannot be due to other conditions such as cor pulmonale, pulmonary embolus, primary pulmonary hypertension, or congenital heart disease. Increasing levels of BNP, although not exceeding the ULN, may also be supportive of the diagnosis of congestive heart failure in selected cases (e.g. morbid obesity).

**AND**

- d. Need for additional/increased therapy  
Initiation of, or an increase in, treatment directed at heart failure or occurring in a patient already receiving maximal therapy for heart failure and including at least one of the following:
  1. Initiation of or a significant augmentation in oral therapy for the treatment of congestive heart failure
  2. Initiation of intravenous diuretic, inotrope, or vasodilator therapy
  3. Uptitration of intravenous therapy, if already on therapy
  4. Initiation of mechanical or surgical intervention (mechanical circulatory support, heart transplantation or ventricular pacing to improve cardiac function), or the use of ultrafiltration, hemofiltration, or dialysis that is specifically directed at treatment of heart failure.

**AND**

- e. No other non-cardiac etiology (such as chronic obstructive pulmonary disease, hepatic cirrhosis, acute renal failure, or venous insufficiency) and no other cardiac etiology (such as pulmonary embolus, cor pulmonale, primary pulmonary hypertension, or congenital heart disease) for signs or symptoms are identified.

**Stroke**

Stroke is defined as the rapid onset of a new neurologic deficit attributed to an obstruction in cerebral blood flow and/or cerebral hemorrhage with no apparent non-vascular cause (eg. trauma, tumor, or infection). Available neuroimaging studies will be considered to support the clinical impression and to determine if there is a demonstrable lesion compatible with an acute stroke.

### **Classification:**

#### Transient Ischemic Attack

A Transient Ischemic Attack is defined as an acute episode of focal cerebral, spinal, or retinal dysfunction caused by an ischemia of central nervous system tissue which resolves within 24 hrs and without neuroimaging evidence of acute infarction.

#### Ischemic Stroke

Ischemic stroke is defined as an acute episode of focal cerebral, spinal, or retinal dysfunction caused by an infarction of central nervous system tissue.

Signs/ symptoms  $\geq$  24 hrs regardless of neuroimaging findings:

Ischemic stroke can be defined clinically- by persistence of signs and symptoms  $\geq$  24 hrs, usually supported by evidence of infarction on neuroimaging (CT or MRI) although very early neuroimaging (usually with CT) may not demonstrate the infarction.

Signs/ symptoms < 24 hrs with neuroimaging evidence of infarction:

Ischemic stroke can be defined by neuroimaging- where neuroimaging (usually MRI diffusion weighted or flair images) confirms the presence of acute infarction even if signs/ symptoms resolve within 24hrs.

Patients admitted for an acute stroke treated with thrombolysis or interventions that have no residual neurologic symptoms after treatment will be classified as an ischemic stroke.

#### Ischemic Stroke with Symptomatic Hemorrhagic Conversion

Hemorrhagic conversion may be a consequence of ischemic stroke and may be symptomatic, resulting in neurologic deterioration, or asymptomatic. Symptomatic Hemorrhagic Conversion is defined neuroimaging evidence of hemorrhage within the area of infarction associated with clinical deterioration (eg. increase in NIHSS of  $\geq$  4 points) or death, symptoms to hemorrhage related mass effect, or symptoms out of proportion to what would be expected from the ischemic stroke or cerebral edema alone. When an Ischemic Stroke with Symptomatic Hemorrhagic Conversion is identified, the date and time of stroke onset will refer to the first onset of the Ischemic Stroke and will not be counted as two events.

#### Hemorrhagic Stroke

Hemorrhagic stroke is defined as an acute episode of focal or global cerebral or spinal dysfunction caused by a non-traumatic intraparenchymal, intraventricular, or subarachnoid hemorrhage.

#### Undetermined- or Uncertain type- of Stroke

Undetermined stroke is defined as a stroke with insufficient information to allow categorization as Ischemic Stroke or Hemorrhagic Stroke. If possible, speculate on the stroke subtype and note in Comments. This is not to signify an indeterminate event where there is insufficient evidence to suspect a stroke had occurred.

## eTable 5. Committee Members and Key Personnel

### **National Heart, Lung, and Blood Institute**

Jerome L. Fleg, Project Officer  
Ruth Kirby

### **ISCHEMIA-CKD Clinical Coordinating Center (CCC)\***

#### **Study Leadership**

Sripal Bangalore (Principal Investigator)

#### **CCC Faculty**

Judith S. Hochman (ISCHEMIA trial Chair)  
David J. Maron (ISCHEMIA trial Co-Chair)  
Jeffrey Berger (Director of the Biorepository, ISCHEMIA Regional Leader)  
Roy Mathew (Country Lead Nephrologist for US)  
Jonathan Newman (ISCHEMIA Regional Leader)  
Harmony R. Reynolds (ISCHEMIA Regional Leader)  
Mandeep Sidhu (US-VA Regional Co-Leader)

#### ***Program Director***

Stephanie Mavromichalis

#### ***Project Managers***

Gia Cobb  
Stephanie Ferket \*\*  
Andre Gabriel \*\*

#### ***Clinical Research Associates***

Diana Cukali  
Kevin McMahon \*\*

#### ***Clinical Trial Assistants***

Ahmed Ayoub  
Matthew Shinseki \*\*  
Paula Wilson  
Solomon Yakubov \*\*

#### ***Data Analyst***

Mark Xavier

*\*see ISCHEMIA Trial Design Manuscript for complete listing*

*\*\*past members*

### **ISCHEMIA Statistical and Data Coordinating Center, Duke Clinical Research Institute**

Sean O' Brien, Principal Investigator  
See ISCHEMIA Trial Design Manuscript for complete listing

## **ISCHEMIA-CKD Committee Members**

### **Steering Committee**

Sripal Bangalore, Principal Investigator  
Judith S. Hochman, ISCHEMIA trial Chair  
David J. Maron, ISCHEMIA trial Co-Chair  
Glenn M. Chertow, Nephrologist  
William Boden, ISCHEMIA trial Co-PI  
Bruce Ferguson, ISCHEMIA trial Co-PI  
Robert Harrington, ISCHEMIA trial Co-PI  
Gregg W. Stone, ISCHEMIA trial Co-PI  
David O. Williams, ISCHEMIA trial Co-PI

### **Renal Committee**

Charles A. Herzog (Chair)  
Sripal Bangalore  
Carlo Briguori  
David M. Charytan  
Glenn M. Chertow  
Jerome Fleg  
Peter A. McCullough  
Roxana Mehran  
Ruth Kirby

### **Publications Committee**

Sripal Bangalore (Chair)  
Karen Alexander  
Jerome Fleg  
Judith S. Hochman  
David J. Maron  
Roy Mathew  
Sean M. O'Brien  
Harmony R. Reynolds  
Mandeep Sidhu

### **Optimal Medical Therapy Committee**

Same as the ISCHEMIA trial (See ISCHEMIA Trial Design Manuscript for complete listing)

### **Optimal Revascularization Therapy Planning Committee**

Same as the ISCHEMIA trial (See ISCHEMIA Trial Design Manuscript for complete listing)

### **Clinical Event Review Committee**

Same as the ISCHEMIA trial (See ISCHEMIA Trial Design Manuscript for complete listing)

### **BioRepository Committee**

Same as the ISCHEMIA trial (See ISCHEMIA Trial Design Manuscript for complete listing)

**EQOL Committee**

Same as the ISCHEMIA trial (See ISCHEMIA Trial Design Manuscript for complete listing)

**Recruitment for Women & Minorities**

Same as the ISCHEMIA trial (See ISCHEMIA Trial Design Manuscript for complete listing)

**DSMB Members**

Same as the ISCHEMIA trial (See ISCHEMIA Trial Design Manuscript for complete listing)

**Independent Statistical Analysis Center for DSMB Reporting**

Same as the ISCHEMIA trial (See ISCHEMIA Trial Design Manuscript for complete listing)

**ECG/ETT Core Lab**

Same as the ISCHEMIA trial (See ISCHEMIA Trial Design Manuscript for complete listing)

**Angiographic Core Lab**

Same as the ISCHEMIA trial (See ISCHEMIA Trial Design Manuscript for complete listing)

**Academic Research Organizations (AROs)**

Same as the ISCHEMIA trial (See ISCHEMIA Trial Design Manuscript for complete listing)

**Contract Research Organizations (CROs)**

Same as the ISCHEMIA trial (See ISCHEMIA Trial Design Manuscript for complete listing)



**eTable 6. Site Listing**

| Country (No. Randomizations) | Investigator(s)                                                                                                                                                                                 | Study Coordinator(s)                                                                                                                                 | City & State (if applicable) | Institution (No. Randomizations)                    |
|------------------------------|-------------------------------------------------------------------------------------------------------------------------------------------------------------------------------------------------|------------------------------------------------------------------------------------------------------------------------------------------------------|------------------------------|-----------------------------------------------------|
| <b>United States (159)</b>   |                                                                                                                                                                                                 |                                                                                                                                                      |                              |                                                     |
| Lead Country Nephrologist    |                                                                                                                                                                                                 |                                                                                                                                                      |                              |                                                     |
| Roy Mathew, MD               | Mayil S. Krishnam, MD<br>Jeffrey C. Milliken, MD<br>Pranav M. Patel, MD<br>Arnold H. Seto, MD<br>Kevin T. Harley, MD (N)<br>Michael A. Gibson, MD<br>Byron J. Allen, MD<br>Wei Ling Lau, MD (N) | Shirin Heydari, MS<br>Edgar Karanjah, MD<br>Wanda C. Marfori, MD<br>Eduardo Hernandez-Rangel, MD<br>Pam Singh                                        | Orange, CA                   | University of California Irvine Medical Center (23) |
|                              | Patricia Pellikka, MD<br>LaTonya J. Hickson, MD (N)                                                                                                                                             | Gaylin Petty, CVT<br>Susan K. Milbrandt<br>Dawn D. Shelstad                                                                                          | Rochester, MN                | Mayo Clinic (16)                                    |
|                              | Harmony R. Reynolds, MD<br>Jonathan D. Newman, MD, MPH<br>Sripal Bangalore, MD, MHA<br>Lawrence M. Phillips, MD<br>Muhamed Saric, MD<br>Olga Zhdanova, MD (N)                                   | Stanley E. Cobos, BA<br>Kirsten J. Quiles, MS<br>Raven R. Dwyer, MPH<br>Dalisa Espinosa, MBS                                                         | New York, NY                 | NYU Langone Medical Center-Bellevue Hospital (15)   |
|                              | Kreton Mavromatis, MD<br>Jason Linefsky, MD<br>Harold Franch, MD (N)                                                                                                                            | John Doan, MD<br>Raven Lee, CCRP<br>Risha Patel                                                                                                      | Decatur, GA                  | Atlanta VA Medical Center (13)                      |
|                              | Anjali Acharya, MD (N)<br>Seth Sokol, MD<br>Jay Meisner, MD<br>Amit Kakkar, MD<br>Tarek Rashid, MD<br>Hatem Elabd, MD                                                                           | Jeanne Russo, RN<br>Cidney Schultz, RN                                                                                                               | Bronx, NY                    | Jacobi Medical Center (12)                          |
|                              | Charles Herzog, MD<br>Mengistu Simegn, MD                                                                                                                                                       | Shari Mackedanz<br>Barbara Wicklund                                                                                                                  | Minneapolis, MN              | Hennepin County Medical Center (9)                  |
|                              | Salvatore P. Costa, MD<br>Terrance Welch, MD<br>Michael Chobanian, MD (N)                                                                                                                       | Henry C. Stokes, RN<br>Gaylin Petty, CVT                                                                                                             | Lebanon, NH                  | Dartmouth Hitchcock Medical Center (7)              |
|                              | Subhash Banerjee, MD                                                                                                                                                                            | Preeti Kamath, BDS, MHA, CCRP<br>Ishita Tejani, BDS, MS, MSPH                                                                                        | Dallas, TX                   | V.A. North Texas Health Care System (6)             |
|                              | Adedayo Adeboye, MD<br>Roy Mathew, MD (N)                                                                                                                                                       | Amy Flowers<br>Kathryn Mason<br>Anjana Rishmawi                                                                                                      | Columbia, SC                 | William Jennings Bryan Don V.A. Medical Center (5)  |
|                              | Sudhanva S. Hegde, MD                                                                                                                                                                           | Stanley E. Cobos, BA<br>Raven R. Dwyer, MPH<br>Dalisa Espinosa, MBS<br>Kirsten J. Quiles, MS<br>Carolyn J. Gruber, PA-C<br>Noelle M. Durfee, MS PA-C | Brooklyn, NY                 | Kings County Hospital Center (9)                    |
|                              | Khaled Abdul-Nour, MD<br>Lalathaksha Kumbar, MD (N)<br>Jerry Yee, MD (N)                                                                                                                        | Heather Golden<br>Naima L. Ogletree, DNP, APRN-BC<br>Schawana Thaxton, DNP, NP-C                                                                     | Detroit, MI                  | Henry Ford Health System (4)                        |
|                              | Alec Moorman, MD<br>Bilal Malik, MD (N)                                                                                                                                                         | Fatima Ranjbaran, RN<br>Bryn Smith, BS                                                                                                               | Seattle, WA                  | University of Washington Medical Center (4)         |

Carly Ohmart

|                                       |                          |                   |                                                          |
|---------------------------------------|--------------------------|-------------------|----------------------------------------------------------|
| Radmilar Lyubarova, MD                | Wendy L. Stewart, MS     | Albany, NY        | Albany Medical Center Hospital (3)                       |
| Mohammad El-Hajjar, MD                | Kristin M. Salmi, BS     |                   |                                                          |
| Mandeep S. Sidhu, MD, MBA             |                          |                   |                                                          |
| Steven A. Fein, MD                    |                          |                   |                                                          |
| Mikhail T. Torosoff, MD, PhD          |                          |                   |                                                          |
| Radmila Lyubarova, MD                 |                          |                   |                                                          |
| Sulagna Mookherjee, MD                |                          |                   |                                                          |
| Krzysztof Drzymalski, MD              |                          |                   |                                                          |
| Rafia Chaudhry, MD (N)                |                          |                   |                                                          |
| Krishnakumar Hongalgi, MD (N)         |                          |                   |                                                          |
| Arif Asif, MD (N)(2012-2015)          |                          |                   |                                                          |
| Loay Salman, MD (N)(2015-2018)        |                          |                   |                                                          |
| Patricia K. Nguyen, MD                | Davis Vo, BS             | Palo Alto, CA     | VA Palo Alto Healthcare System (3)                       |
| Yiming Lit, MD (N)                    | James Hirsch, BS         |                   |                                                          |
| Steven P. Sedlis, MD                  | Leandro C. Maranan, CCRC | New York, NY      | VA New York Harbor Health Care System (3)                |
| Robert M. Donnino, MD                 |                          |                   |                                                          |
| Jeffrey Lorin, MD                     |                          |                   |                                                          |
| David Goldfarb, MD (N)                |                          |                   |                                                          |
| Mohammad El-Hajjar, MD                | Jennifer Thomson, MA     | Albany, NY        | Samuel Stratton VA Medical Center of Albany NY (2)       |
| Paul Der Mesropian, MD (N)            |                          |                   |                                                          |
| Joseph Sacco, MD                      |                          |                   |                                                          |
| Naveed Akhtar, MD                     |                          |                   |                                                          |
| Maris Orgera, MD                      |                          |                   |                                                          |
| Mandeep S. Sidhu, MD, MBA (2012-2016) |                          |                   |                                                          |
| Roy Mathew, MD (N) (2012-2015)        |                          |                   |                                                          |
| Elvira Gosmanova, MD (N) (2015-2018)  |                          |                   |                                                          |
| Fadi Hage, MD                         | Badhma Valaiyapathi, MD  | Birmingham, AL    | UAB Vascular Biology and Hypertension Program (2)        |
| Dana Rizk, MD (N)                     |                          |                   |                                                          |
| James E. Davies, MD                   |                          |                   |                                                          |
| Massoud Leesar, MD                    |                          |                   |                                                          |
| Jaekyeong Heo, MD                     |                          |                   |                                                          |
| Amy Iskandrian, MD                    |                          |                   |                                                          |
| Firas Al Solaiman, MD                 |                          |                   |                                                          |
| Satinder Singh, MD                    |                          |                   |                                                          |
| Peter H. Stone, MD                    | Hermine Osseni, MS       | Boston, MA        | Brigham & Women's Hospital, Harvard Medical School (2)   |
| David Charytan, MD (N)                | Charlene Wiyarand (BS)   |                   |                                                          |
|                                       | Peter Douglass, BA       |                   |                                                          |
|                                       | Hayley Pomeroy, BA       |                   |                                                          |
|                                       | Alexandra Craft, BA      |                   |                                                          |
|                                       | Bethany Harvey, BA       |                   |                                                          |
| Kevin Marzo, MD                       | Wendy Drewes, RN         | Mineola, NY       | NYU Winthrop (2)                                         |
| Juan Gaztanaga, MD                    |                          |                   |                                                          |
| Shayan Shirazian, MD (N)              | Dipti Patel, RN          |                   |                                                          |
| Lekshmi Dharmarajan, MD               | Jenne M. Jose, PA        | Bronx, NY         | NYU-HHC Lincoln Medical and Mental Health Center (2)     |
|                                       | Stanley E. Cobos, BA     |                   |                                                          |
|                                       | Raven R. Dwyer, MPH      |                   |                                                          |
|                                       | Kirsten J. Quiles, MS    |                   |                                                          |
| Janani Rangaswami, MD (N)             | Rachel Murphy, BS        | Philadelphia, PA  | Albert Einstein Medical Center (2)                       |
| Christian Witzke, MD                  | Kinnari Murphy, MPH      |                   |                                                          |
| Gregg Pressman, MD                    |                          |                   |                                                          |
| John B. Kostis, MD                    | Nora M. Cosgrove, RN     | New Brunswick, NJ | Cardiovascular Institute, Rutgers RWJ Medical School (1) |
| Abel E. Moreyra, MD                   |                          |                   |                                                          |
| Jonathan Lebowitz, MD (N)             |                          |                   |                                                          |

|                                                                                         |                                                                                                                                   |                      |                                                      |
|-----------------------------------------------------------------------------------------|-----------------------------------------------------------------------------------------------------------------------------------|----------------------|------------------------------------------------------|
| Ellis W. Lader, MD<br>Beth Stefanchik, MD (N)                                           | Martha Meyer, RN, MSN                                                                                                             | Kingston, NY         | Mid Valley Cardiology (1)                            |
| Sampoornima Setty, MD<br>Balaji Srinivasan, MD (N)                                      | Kimberly E. Halverson, RHIT<br>Christine Roraff, RN<br>Jonean Thorsen, RN                                                         | La Crosse, WI        | Gundersen Lutheran Medical Center (1)                |
| Rita Coram, MD                                                                          | Anne Marie Webb, BSN<br>Ellie Fridell, BS<br>Heidi Wilson, BS                                                                     | Louisville, KY       | University of Louisville (1)                         |
| David Booth, MD<br>John Kotter, MD<br>Ahmed Abdel-Latif, MD, PhD<br>Sadiq Ahmed, MD (N) | Yvonne Taul, RN<br>Caroline Rodgers, RN<br>Jennifer Isaacs, MS<br>Viktoria Bulkley, RN<br>Laura True, RN<br>Alexandra Hunter, MPH | Lexington, KY        | Lexington VA Medical Center (1)                      |
| Michelle Ratliff, MD<br>Karen Servilla, MD (N)                                          | Robyn Elliott<br>Jennifer Hogan                                                                                                   | Albuquerque, NM      | New Mexico V.A. Healthcare System (1)                |
| James J. Jang, MD<br>Gennie Yee, MD<br>Deepa Ramaswamy, MD (N)                          | Olivia Anaya                                                                                                                      | San Jose, CA         | Kaiser Permanente San Jose (1)                       |
| Michel Georges Khouri, MD<br>John Middleton, MD (N)                                     | Kristine Arges<br>Melissa LeFevre<br>Jennifer Tomfohr                                                                             | Durham, NC           | Duke University Medical Center (1)                   |
| Jason T. Call, MD<br>David Sisson, MD (N)                                               | Stephanie, M. Lane, RN, BSN, CCRN<br>Jennifer L. Stanford, RN, MSN                                                                | Winchester, VA       | Winchester Cardiology and Vascular Medicine, PC (1)  |
| Prakash Deedwania, MD<br>Kiran Reddy, MD<br>Mei Hwang, MD (N)                           | Antonia Vega                                                                                                                      | Fresno, CA           | UCSF - Fresno Community Regional Medical Center (1)  |
| Steven Weitz, MD<br>Page Salanger, MD (N)                                               | Steven Giovannone<br>Lori Pritchard, RN                                                                                           | Schenectady, NY      | Cardiology Associates of Schenectady P.C. (1)        |
| Ray Wyman, MD                                                                           | Joy Burkhardt, CCRP<br>Suellen Hosino, RN, BSN, CCRP                                                                              | Torrance, CA         | Torrance Memorial Medical Center (1)                 |
| Khaled Dajani, MD<br>Holly Mattix-Kramer, MD (N)<br>Verghese Mathew, MD                 | Carol M. Kartje, BSN                                                                                                              | Maywood, IL          | Loyola University Medical Center (1)                 |
| Michael D. Shapiro, DO<br>Jose Rueda, MD (N)                                            | Ayun Naher, MBBS, MS<br>David Schlichting, LPN                                                                                    | Portland, OR         | Oregon Health & Science University (1)               |
| Omar Almousalli, MD<br>John Lehman, MD<br>Norbert Urbanski, MD                          | Elizabeth Capasso-Gulve<br>Alaine Melanie Loehr<br>Marlowe Mosley                                                                 | Fairview Heights, IL | Advanced Heart Care Group / MEDICORICIUM, L.L.C. (1) |

### Russia (111)

Lead Country Cardiologist  
Olga Bockeria, MD, PhD  
Lead Country Nephrologist  
Evgeny Shutov, MD

|                                                                                                                                |                                               |                  |                                                                                                        |
|--------------------------------------------------------------------------------------------------------------------------------|-----------------------------------------------|------------------|--------------------------------------------------------------------------------------------------------|
| Alexander M. Chernyavskiy, MD, PhD<br>Evgeniy I. Kretov, MD<br>Igor O. Grazhdankin, MD<br>Alexander Sergeevich Borisov, MD (N) | Ivan A. Nayshkin, MD                          | Novosibirsk      | E. Meshalkin National Medical Research Center of the Ministry of Health of the Russian Federation (73) |
| Leo A. Bockeria, MD, PhD<br>Karen Petrosyan, MD, PhD<br>Evgeny Shutov, MD (N)                                                  | Olga Bockeria, MD, PhD<br>Zalina Kudzoeva, MD | Moscow           | National Medical Research Center for Cardiovascular Surgery (34)                                       |
| Leonid L. Bershtein, MD, PhD<br>Sergey A. Sayganov, MD, PhD                                                                    | Irina Subbotina<br>Victoria Gumerova          | Saint Petersburg | North-Western State Medical University (4)                                                             |

Anastasia M. Kuzmina-  
Krutetskaya, MD  
Elizaveta V. Zbyshevskaya, MD,  
PhD  
Nana O. Katamadze, MD, PhD  
Vladimir Ryasniansky, MD (N)

**Poland (105)**

Lead Country Cardiologists  
Radoslaw Pracon, MD, PhD  
Marcin Demkow, MD, PhD  
Lead Country Nephrologist  
Robert Malecki, MD

|                                                                                                                                                                                                                                                                                                                                                                                                                                                                                                                                                                                              |                                                                     |          |                                                                                                                         |
|----------------------------------------------------------------------------------------------------------------------------------------------------------------------------------------------------------------------------------------------------------------------------------------------------------------------------------------------------------------------------------------------------------------------------------------------------------------------------------------------------------------------------------------------------------------------------------------------|---------------------------------------------------------------------|----------|-------------------------------------------------------------------------------------------------------------------------|
| Tomasz Mazurek, MD, PhD<br>Karolina Wojtera, MD<br>Anna Fojt, MD<br>Ewa Szczerba, MD                                                                                                                                                                                                                                                                                                                                                                                                                                                                                                         | Jakub Maksym, MD                                                    | Warszawa | Medical University of Warsaw (57)                                                                                       |
| Piotr Pruszczyk, MD, PhD<br>Marek Roik, MD, PhD                                                                                                                                                                                                                                                                                                                                                                                                                                                                                                                                              | Andrzej Łabryk, MD<br>Agnieszka Szramowska, MD<br>Olga Zdończyk, MD | Warszawa | Department of Internal Medicine and<br>Cardiology, Infant Jesus Teaching Hospital,<br>Medical University of Warsaw (22) |
| Marcin Demkow, MD, PhD<br>Radoslaw Pracon, MD, PhD<br>Cezary Kepka, MD PhD<br>Anna Teresinska, MD PhD<br>Karolina Kryczka, MD PhD<br>Jan Henzel, MD PhD<br>Mateusz Solecki, MD PhD<br>Edyta Kaczmarska, MD PhD<br>Robert Malecki, MD (N)                                                                                                                                                                                                                                                                                                                                                     | Olga Walesiak<br>Katarzyna Malinowska                               | Warsaw   | Coronary and Structural Heart Diseases<br>Department, Institute of Cardiology (19)                                      |
| Jaroslav Drozd, PhD<br>Bartosz Czarniak, MD<br>Malgorzata Frach (formerly<br>Stasiak), MD<br>Konrad Szymczyk, MD<br>Iwona Niedzwiecka, MD<br>Sebastian Sobczak, MD<br>Tomasz Ciurus, MD<br>Piotr Jakubowski, MD<br>Magdalena Misztal-Teodorczyk,<br>MD<br>Dawid Teodorczyk, MD<br>Aleksandra Fratczak, MD<br>Marcin Szkopiak, MD<br>Patrycja Lebiada, MD<br>Michal Wlodarczyk, MD<br>Anna Plachcinska, MD<br>Jacek Kusmierek, MD<br>Magdalena Miller, MD<br>Halina Marciniak, MD<br>Karolina Wojtczak-Soska, MD<br>Katarzyna Łuczak, MD<br>Tomasz Tarchalski, MD<br>Anna Cichocka-Radwan, MD | Marta Swiderek, MA<br>Ewelina Wojtala, MA                           | Lodz     | Cardiology Clinic, Medical University in Lodz<br>(7)                                                                    |

**India (92)**

Lead Country Cardiology  
Balram Bhargava, DM  
Lead Country Nephrologist  
Sandeep Mahajan, MD

|                                                 |                   |         |                                 |
|-------------------------------------------------|-------------------|---------|---------------------------------|
| Sajeew Chakanalil Govindan,<br>MD, DNB, DM, PhD | Anjali Anand, MSc | Calicut | Government Medical College (23) |
|-------------------------------------------------|-------------------|---------|---------------------------------|

|                                                                                                                                                                                                                                                                                                                                                                                                                         |                                                                                                                                         |            |                                                                     |
|-------------------------------------------------------------------------------------------------------------------------------------------------------------------------------------------------------------------------------------------------------------------------------------------------------------------------------------------------------------------------------------------------------------------------|-----------------------------------------------------------------------------------------------------------------------------------------|------------|---------------------------------------------------------------------|
| Rajesh Gopalan Nair, MD, DNB, DM<br>Melemadathil Srilatha, MD, DM (N)                                                                                                                                                                                                                                                                                                                                                   | Janitha Raj, B.Tech<br>Reshma Ravindran, MSc<br>Rajalekshmi VS, MSc, MScCRRA                                                            |            |                                                                     |
| Atul Mathur, MD<br>Uendra Kaul, MD<br>Sanjeev Gulati MD, DM (N)                                                                                                                                                                                                                                                                                                                                                         | Ajit Singh Narula, MD<br>Vijay Kher, MD<br>Puneet Sodhi, MD                                                                             | New Delhi  | Fortis Escort Heart Institute (13)                                  |
| Anoop Mathew, MD<br>Eapen Punnoose, MD<br>TA Kishore, MD (N)<br>Satish Sankaranarayanan, MD (N)                                                                                                                                                                                                                                                                                                                         | Binoy Mannekkattukudy Kurian                                                                                                            | Kolenchery | MOSC Medical College Hospital (12)                                  |
| Ranjan Kachru, MD<br>Sanjeev Gulati, MD (N)                                                                                                                                                                                                                                                                                                                                                                             | Abhishek Dubey, PGDACR                                                                                                                  | New Delhi  | Fortis Healthcare Ft.Lt. Rajan Dhall Hospital (11)                  |
| Balram Bhargava, DM<br>Sandeep Mahajan, MD (N)<br>G.Karthikeyan, DM<br>S.Ramakrishnan, DM<br>Sandeep Seth, DM<br>Rakesh Yadav, DM<br>Sandeep Singh, DM<br>Ambuj Roy, DM<br>Neeraj Parakh, DM<br>Sunil Kumar Verma, DM<br>Rajiv Narang, DM<br>Sundeep Mishra, DM<br>Nitish Naik, DM<br>Gautam Sharma, DM<br>Shiv Kumar Choudhary, M.Ch<br>Chetan Patel, DNB<br>Gurpreet Gulati, MD<br>Sanjeev Sharma, MD<br>V K Bahl, DM | Chandini Suvarna, BDS                                                                                                                   | New Delhi  | All India Institute Of Medical Sciences (8)                         |
| Neeraj Pandit, MD, DM<br>Ajay Sharma, MD, DM<br>Niruta Sharma MD<br>Hemant Shakhar Mahapatra MD                                                                                                                                                                                                                                                                                                                         | Sheromani Bajaj<br>Vandana Yadav, Msc, PGDACR<br>Girish Mishra, Msc, PGDACR                                                             | New Delhi  | Dr Ram Manohar Lohia Hospital (5)                                   |
| Cholenahally Nanjappa<br>Manjunath, MD, DM<br>Nagaraja Moorthy, MD, DM<br>Satvic Cholenahally Manjunath, MD, DM<br>Suryaprakash Narayanappa, MBBS<br>Umesh Lingaraj, MD (N)<br>Veerabhadra Gupta, MD (N)                                                                                                                                                                                                                | Nandita Nataraj, BE(Biotech)<br>PGDICRCMD<br>Soundarya Nayak, BE(Biotech)<br>PGDICRCMD<br>Mahevamma Mylarappa, GNM<br>(General Nursing) | Bengaluru  | Sri Jayadeva Institute of Cardiovascular Sciences and Research (4)  |
| Milind Avdhoot Gadkari, MD<br>Siddharth Gadage, MD DNB<br>Tapan Umesh Pillay, BHMS<br>MSc<br>Valentine Lobo, MD (N)                                                                                                                                                                                                                                                                                                     | Sheetal Rupesh Karwa, BHMS<br>Suvarna Kolhe, MSc                                                                                        | Pune       | KEM Hospital Pune (4)                                               |
| Johann Christopher, MD, DNB<br>Nirmal Kumar, MD, DM<br>Suresh Kumar, MD, DM (N)                                                                                                                                                                                                                                                                                                                                         | K. Manjula Rani, MSc.<br>M. Sowjanya Reddy, BSc<br>K. Preethi, BSc                                                                      | Hyderabad  | Gurunanak CARE Hospital (3)                                         |
| John Jose, MD<br>Vinoi George David, MD (N)                                                                                                                                                                                                                                                                                                                                                                             | Anu Tharini<br>Anandaroop Lahiri                                                                                                        | Vellore    | Christian Medical College (3)                                       |
| Gurpreet S. Wander, DM<br>Rohit Tandon, MD                                                                                                                                                                                                                                                                                                                                                                              | Baljeet Kaur, MSc (Biotechnology)<br>Sonika Gupta, MBA, B. Pharmacy                                                                     | Ludhiana   | Hero DMC Heart Institute, Dayanand Medical College and Hospital (2) |

Sarju Ralhan, M.Ch (CTVS)  
 Naved Aslam, DM  
 Abhishek Goyal, DM  
 Vikas Makkar, DM (N)

|                             |                       |           |                                                                |
|-----------------------------|-----------------------|-----------|----------------------------------------------------------------|
| S.K. Dwivedi, DM            | Roma Tewari, PG       | Lucknow   | King George's Medical University, Department of Cardiology (2) |
| V.S. Narain, DM             | Meenakshi Mishra, PG  |           |                                                                |
| Sharad Chandra, DM          | Shivali Patel         |           |                                                                |
|                             | Suman Singh, PG       |           |                                                                |
| Johann Christopher, MD      | Sowjanya Reddy        | Hyderabad | CARE Hospital (1)                                              |
| Praneeth Polamuri, MD       | Manjula Rani          |           |                                                                |
| Vikranth Reddy, MD, DNB (N) |                       |           |                                                                |
| Upendra Kaul, MD            | Priyadarshani Arambam | New Delhi | Batra Hospital and Medical Research Centre (BHMRC) (1)         |
|                             | Bebek Singh           |           |                                                                |

### China (70)

Lead Country Cardiologist

Lixin Jiang, MD, PhD

Lead Country Nephrologists

Xuemei Li, MD

|                        |                 |           |                                                              |
|------------------------|-----------------|-----------|--------------------------------------------------------------|
| Hong Cheng, MD         | Jing Dong, MD   | Beijing   | Beijing Anzhen Hospital (24)                                 |
| Weijing Bian, MD       | Xiaoyi Xu, MD   |           |                                                              |
| Guoqin Wang, MD        |                 |           |                                                              |
| Jiyan Chen, MD         | Haojian Dong    | Guangzhou | Guangdong General Hospital (15)                              |
| Zhiming Ye, MD (N)     | Peiyu He        |           |                                                              |
|                        | Chunli Xia      |           |                                                              |
|                        | Junqing Yang    |           |                                                              |
|                        | Qi Zhong        |           |                                                              |
| Xin Fu, MD             | Dan Gao         | Zhengzhou | The First Affiliated Hospital of Zhengzhou University (13)   |
| Zhangsuo Liu, MD (N)   | Dengke Jiang    |           |                                                              |
|                        | Ran Leng        |           |                                                              |
|                        | Xutong Wang     |           |                                                              |
|                        | Qianqian Yuan   |           |                                                              |
|                        | Lili Zhang      |           |                                                              |
| Shuyang Zhang, MD, PhD | Ying Wang, MD   | Beijing   | Peking Union Medical College Hospital (11)                   |
| Zhenyu Liu, MD         | Ye Chen Han, MM |           |                                                              |
| Xuemei Li, MD (N)      | Lihong Xu, RN   |           |                                                              |
|                        | Zhenyu Liu      |           |                                                              |
|                        | Gang Chen, MD   |           |                                                              |
|                        | Rongrong Hu     |           |                                                              |
| Yitong Ma, MD (N)      | Dongze Li       | Urumqi    | First Affiliated Hospital of Xinjiang Medical University (7) |
| Yining Yang, MD        | Xiaomei Li      |           |                                                              |
|                        | Xiang Ma        |           |                                                              |
|                        | Zixiang Yu      |           |                                                              |
|                        | Qian Zhao       |           |                                                              |

### Italy (62)

Lead Country Cardiologist

Francesco Orso, MD

|                         |                          |        |                                                  |
|-------------------------|--------------------------|--------|--------------------------------------------------|
| Carlo Briguori, MD      | Francesca DeMicco        | Naples | Clinica Mediterranea (52)                        |
| Gian Piero Perna, MD    | Francesca Pietrucci, PhD | Ancona | Cardiology and CCU - Ospedali Riuniti Ancona (7) |
| Marco Marini, MD        |                          |        |                                                  |
| Gabriele Gabrielli, MD  |                          |        |                                                  |
| Mario D'arezzo, MD (N)  |                          |        |                                                  |
| Marco Sicuro, MD        | Gianpiero Leone, MD      | Aosta  | Ospedale Regionale Umberto Parini (1)            |
| Valentina Pellu, MD (N) | Francesco Pisano, MD     |        |                                                  |
|                         | Cristina Bare, BSc       |        |                                                  |

|                                                                         |                  |        |                                                                                              |
|-------------------------------------------------------------------------|------------------|--------|----------------------------------------------------------------------------------------------|
| Paolo Calabro, MD<br>Tiziana Formisano, MD<br>Piero Tassinario, MD (N)  | Fabio Fimiani    | Napoli | AORN Dei Colli "V. Monaldi" UOC Cardiologia<br>Università della Campania "L. Vanvitelli" (1) |
| Marcello Galvani, MD<br>Filippo Ottani, MD<br>Marco De Fabritis, MD (N) | Chiara Attanasio | Fori   | Ospedale "G.B. Morgagni – L. Pierantoni" Fori<br>(AUSL della Romagna) (1)                    |

### Mexico (30)

Lead Country Cardiologist

Jorge Escobedo, MD

Lead Country Nephrologist

Magdalena Madero, MD

|                                                                                                                                                                                                                                                                                               |                          |                 |                                                        |
|-----------------------------------------------------------------------------------------------------------------------------------------------------------------------------------------------------------------------------------------------------------------------------------------------|--------------------------|-----------------|--------------------------------------------------------|
| Juan Manuel López Quijano, MD, MSc<br>Alejandro Chevaile Ramos, MD (N)<br>Jorge Carrillo Calvillo, MD                                                                                                                                                                                         | Teresa Delgadillo        | San Luis Potosi | Hospital Central Dr. Ignacio Morones Prieto (16)       |
| Jorge Escobedo, MD<br>Rubén Baleón-Espinosa, MD<br>Arturo S Campos-Santaolalla, MD<br>Elihú Durán-Cortés, MD<br>José M Flores-Palacios, MD<br>Andrés García-Rincón, MD<br>Moisés Jiménez-Santos, MD<br>Joaquín V Peñafiel, MD<br>José A Ortega-Ramírez, MD<br>Aquilaes Valdespino-Estrada, MD | Ramon de Jesús-Pérez, RN | Benito Juarez   | Instituto Mexicano del Seguro Social (10)              |
| Erick Alexánderson Rosas, MD<br>Magdalena Madero Rovalo, DM (N)                                                                                                                                                                                                                               | María Pérez García       | Mexico City     | Instituto Nacional de Cardiología "Ignacio Chávez" (2) |
| Guillermo Garcia-Garcia (N)<br>Jonathan S. Chavez-Iñiguez                                                                                                                                                                                                                                     | Lorena Lopez, BS         | Guadalajara     | Hospital Civil de Guadalajara Fray Antonio Alcalde (2) |

### Canada (24)

Lead Country Cardiologists

Akshay Bagai, MD, MHS

Kevin R. Baine, MD, MSc

Lead Country Nephrologist

Ron Wald, MDCM, MPH

|                                                                                                                                                                                                                                         |                                                                                   |                    |                                                   |
|-----------------------------------------------------------------------------------------------------------------------------------------------------------------------------------------------------------------------------------------|-----------------------------------------------------------------------------------|--------------------|---------------------------------------------------|
| Kevin R. Baine, MD, MSc<br>Neesh Pannu, MD (N)                                                                                                                                                                                          | Norma Hogg, RN<br>Suzanne Welsh, RN                                               | Edmonton, AB       | University of Alberta (15)                        |
| Asim N. Cheema, MD, PhD<br>Akshay Bagai, MD, MHS<br>Ron Wald, MDCM, MPH (N)<br>Shaun Goodman, MD, MSc<br>John Joseph Graham, MRCP, MB ChB, BSc<br>Mark Peterson, MD, FRCSC, PhD<br>Chi-Ming Chow, MD, CM, MSc<br>Beth Abramson, MD, MSc | Khrystyna Kushniriuk, HBSc, MD<br>Mohammed Hussain<br>Olugbenga Bello             | Toronto, ON        | St. Michael's Hospital (3)                        |
| Graham Wong, MD<br>Kenneth Gin, MD<br>Christopher Fordyce, MD                                                                                                                                                                           | Jackie Chow, BSN<br>Andrew Starovoytov, MD<br>Naomi Uchida, BSN<br>Ngairé Meadows | Vancouver, BC      | Vancouver General Hospital (2)                    |
| Ariel Diaz, MD<br>Philippe Rheault, MD<br>Alejandro Gisbert, MD                                                                                                                                                                         | Isabelle Roy, RN<br>Patricia Alarie, RN<br>Linda Arcand, RN                       | Trois-Rivieres, QC | Centre Hospitalier de Regional Trois-Rivieres (1) |

|                          |                      |              |                                                                                                                                   |
|--------------------------|----------------------|--------------|-----------------------------------------------------------------------------------------------------------------------------------|
| Alain Raymond, MD        | Estelle Montpetit    |              |                                                                                                                                   |
| Yanek Pépin-Dubois, MD   |                      |              |                                                                                                                                   |
| Miguel Barrero, MD       |                      |              |                                                                                                                                   |
| Carl-Éric Gagné, MD      |                      |              |                                                                                                                                   |
| Mark Garand, MD          |                      |              |                                                                                                                                   |
| Ricardo Costa, MD        |                      |              |                                                                                                                                   |
| Catherine Lemay, MD      |                      |              |                                                                                                                                   |
| Ying Tung Sia, MD        |                      |              |                                                                                                                                   |
| Pierre Gervais, MD       |                      |              |                                                                                                                                   |
| Alain Rheault, MD        |                      |              |                                                                                                                                   |
| Pallav Garg, MBBS, MSc   | Sandy Carr, RN       | London, ON   | London Health Sciences Centre (1)                                                                                                 |
| Matthew Weir, MD (N)     | Catherine Bone, RN   |              |                                                                                                                                   |
| Amar Uxa, MD             | Nadia Asif           | Toronto, ON  | University Health Network (1)                                                                                                     |
| Michael Farkouh, MD      |                      |              |                                                                                                                                   |
| Christopher Chan, MD (N) | Suzana Tavares       |              |                                                                                                                                   |
| Philippe Généreux, MD    | Chantale Mercure, RN | Montréal, QC | Centre Intégral Universitaire De Santé et de Services Sociaux du Nord de l'île de Montréal /Hôpital du Scaré-Cœur de Montréal (1) |
| Jean Diodati, MD         |                      |              |                                                                                                                                   |
| François Madore, MD (N)  |                      |              |                                                                                                                                   |

### Singapore (14)

Lead Country Cardiologist

Kian-Keong Poh, MD

Lead Country Nephrologist

Titus Lau, MD

|                         |                                              |           |                                                 |
|-------------------------|----------------------------------------------|-----------|-------------------------------------------------|
| Kian-Keong Poh, MD      |                                              | Singapore | National University Heart Center Singapore (11) |
| Ping Chai, MD           |                                              |           |                                                 |
| Titus Lau, MD (N)       |                                              |           |                                                 |
| Joshua P. Loh, MD       |                                              |           |                                                 |
| Edgar L. Tay, MD        |                                              |           |                                                 |
| Kristine Teoh, MD       | Sik-Yin V Tan, BSc                           |           |                                                 |
| Lynette L. Teo, MD      | Winnie C Sia, BSc                            |           |                                                 |
| Ching-Ching Ong, MD     | Audrey W Leong, BSc                          |           |                                                 |
| Raymond C. Wong, MD     |                                              |           |                                                 |
| Poay-Huan Loh, MD       |                                              |           |                                                 |
| Theodoros Kofidis, MD   |                                              |           |                                                 |
| Wan Xian Chan, MD       |                                              |           |                                                 |
| Koo Hui Chan, MD        |                                              |           |                                                 |
| David Foo, MBBS         | Li Hai Yan, RN                               | Singapore | Tan Tock Seng Hospital (2)                      |
| Jason Loh Kwok Kong, MD |                                              |           |                                                 |
| Ching Min Er, MD        |                                              |           |                                                 |
| Fahim Haider Jafary, MD |                                              |           |                                                 |
| Tracy Tan, MD (N)       |                                              |           |                                                 |
| Terrance Chua, MD       | Nasrul Ismail<br>Min Tun Kyaw<br>Deborah Yip | Singapore | National Heart Centre Singapore (1)             |

### Brazil (13)

Lead Country Cardiologist

Renato D. Lopes, MD, PhD

Lead Country Nephrologists

Maria Eugenia Canziani, MD (Lead)

Sergio Draibe, MD (Co-Lead)

|                                      |                         |           |                                                     |
|--------------------------------------|-------------------------|-----------|-----------------------------------------------------|
| Whady Hueb, MD                       | Myrthes Emy Takiuti, RN | Sao Paulo | Heart Institute (InCor) University of São Paulo (6) |
| Eduardo Gomes Lima, MD               |                         |           |                                                     |
| Paulo Cury Rezende, MD               |                         |           |                                                     |
| Expedito Eustáquio Ribeiro Silva, MD |                         |           |                                                     |
| Alexandre Ciappina Hueb, MD          |                         |           |                                                     |



|                                                                                                                                                                                                                                         |                                                                                                                                |              |                                              |
|-----------------------------------------------------------------------------------------------------------------------------------------------------------------------------------------------------------------------------------------|--------------------------------------------------------------------------------------------------------------------------------|--------------|----------------------------------------------|
| Marianna D. A. Dracoulakis, MD, PhD<br>Rodolfo G. S. D Lima, MD<br>Paulo Nov is Rocha, MD (N)                                                                                                                                           | Natalia S Oliv eira, RN                                                                                                        | Salv ador    | Hospital da Bahia (5)                        |
| Alexandre Schaan de Quadros, MD<br>Renato Abdala Karam Kalil, MD<br>José Luiz da Costa Vieira, MD<br>Gabriel Grossmann , MD<br>Pedro Píccaro de Oliveira, MD<br>Leonardo Bridi, MD<br>Simone Sav aris, MD<br>Renato George Eick, MD (N) | Aline Peixoto Deiro<br>Alice Manica Muller<br>Maria Antonieta Pereira de Moraes<br>Bruna Maria Ascoli<br>Sílvia Zottis Poletti | Porto Alegre | Instituto de Cardiologia de Porto Alegre (1) |
| Paola Emanuela Poggio Smanio, MD, PhD<br>Leda Lotaif , MD, PhD (N)                                                                                                                                                                      | Leonardo Pizzol Caetano, PhD                                                                                                   | São Paulo    | Instituto Dante Pazzanese de Cardiologia (1) |

### Hungary (12)

Lead Country Cardiologist

Andras Vertes, MD

Lead Country Nephrologist

Peter Voros, MD

|                                                        |                                                               |          |                                                      |
|--------------------------------------------------------|---------------------------------------------------------------|----------|------------------------------------------------------|
| Andras Vertes, MD<br>Peter Voros, MD (N)               | Judit Sebo, MD<br>Zoltan Davidovits, MD<br>Laszlo Matics      | Budapest | Eszszk- Szent Istvan Hospital (10)                   |
| Bela Merkely , MD, PhD, DSc<br>Mihaly Tapolyai, MD (N) | Andrea Bartykowszki, MD<br>Pal Maurovich-Horvat, MD, PhD, MPH | Budapest | Heart and Vascular Center, Semmelweis University (1) |
| Albert Varga, MD, PhD<br>Timea Boros, MD (N)           | Gergely Ágoston, MD                                           | Szeged   | University of Szeged (1)                             |

### Lithuania (12)

Lead Country Cardiologist

Jelena Celutkiene, MD

Lead Country Nephrologist

Marius Miglinas, MD, PhD

|                                                                                 |                                                                                                                                                                                                   |         |                                                     |
|---------------------------------------------------------------------------------|---------------------------------------------------------------------------------------------------------------------------------------------------------------------------------------------------|---------|-----------------------------------------------------|
| Aleksandras Laucevicius, MD<br>Jelena Celutkiene, MD<br>Marius Miglinas, MD (N) | Agne Juceviciene, MD<br>Irma Kalibataite-Rutkauskiene, MD<br>Laura Keinaite<br>Monika Laukyte<br>Gelmina Mikolaitiene<br>Akvile Smigelskaite, MD<br>Ilona Tamasauskiene, MD<br>Agne Urboniene, MD | Vilnius | Vilnius University Hospital Santariskes Clinic (12) |
|---------------------------------------------------------------------------------|---------------------------------------------------------------------------------------------------------------------------------------------------------------------------------------------------|---------|-----------------------------------------------------|

### Portugal (10)

Lead Country Cardiologist

Ruben Ramos, MD

Lead Country Nephrologist

Fernando Nolasco, PhD

|                                                                                                                                                                                                                                 |                                                 |        |                                                     |
|---------------------------------------------------------------------------------------------------------------------------------------------------------------------------------------------------------------------------------|-------------------------------------------------|--------|-----------------------------------------------------|
| Ruben Ramos, MD<br>Duarte Cacula, MD<br>Ana Santana, MD<br>Antonio Fiarresga, MD<br>Lidia Sousa, MD<br>Hugo Marques, MD<br>Lino Patricio, MD<br>Luis Bernanrdes, MD<br>Pedro Rio, MD<br>Ramiro Carvalho, MD<br>Rui Ferreira, MD | Mafalda Selas<br>Filipa Silva<br>Cláudia Freixo | Lisbon | Hospital de Santa Marta / Hospital Curry Cabral (8) |
|---------------------------------------------------------------------------------------------------------------------------------------------------------------------------------------------------------------------------------|-------------------------------------------------|--------|-----------------------------------------------------|

Tiago Silva, MD  
 Ines Rodrigues, MD  
 Pedro Modas, MD  
 Guilherme Portugal, MD  
 Jose Fragata, MD  
 Marina Vieira, MD  
 Fernando Nolasco, PhD (N)  
 Marina Vieira, MD  
 Fernando Caeiro, MD

---

|                         |                         |         |                                                     |
|-------------------------|-------------------------|---------|-----------------------------------------------------|
| Pedro Farto e Abreu, MD | Maura Carina Nédio, BSc | Amadora | Hospital Professor Doutor Fernando Fonseca, EPE (1) |
|-------------------------|-------------------------|---------|-----------------------------------------------------|

Sérgio Bravo Baptista, MD, PhD  
 Miguel Borges Santos, MD  
 Patricia Carrilho, MD (N)

---

|                      |                            |        |                                                                  |
|----------------------|----------------------------|--------|------------------------------------------------------------------|
| Fausto J. Pinto, PhD | Inês Zimbarra Cabrita, PhD | Lisbon | Santa Maria University Hospital, Cardiology Department, CHLN (1) |
|----------------------|----------------------------|--------|------------------------------------------------------------------|

Miguel Nobre Menezes, MD  
 Guilhermina Cantinho Lopes, MD  
 Ana Gomes Almeida, PhD  
 Pedro Canas Silva, MD  
 Angelo Nobre, MD  
 Ana Rita Francisco, MD  
 Jose Lopes, MD (N)

Andreia Rocha, MSc  
 Francisca Patuleia Figueiras, PhD  
 Andreia Coelho, BSc  
 Marta Capinha  
 Maria Inês Caetano  
 Susana Silva

**Spain (9)**

Lead Country Cardiologist

Almudena Castro, MD

Lead Country Nephrologist

Rafael Selgas, MD

---

|                            |                                   |        |                             |
|----------------------------|-----------------------------------|--------|-----------------------------|
| Jose Lopez-Sendon, MD, PhD | Virginia Fernández-Figares, Pharm | Madrid | Hospital La Paz. IdiPaz (6) |
|----------------------------|-----------------------------------|--------|-----------------------------|

Almudena Castro, MD  
 Elena Refoyo Salicio, MD  
 Gabriela Guzman, MD  
 Gabriel Galeote, MD  
 Silvia Valbuena, MD  
 Rafael Selgas, MD (N)

---

|                        |                          |          |                                                                                                                                                      |
|------------------------|--------------------------|----------|------------------------------------------------------------------------------------------------------------------------------------------------------|
| Jesús Peteiro, MD, PhD | Moisés Blanco-Calvo, PhD | A Coruna | Complejo Hospitalario Universitario A Coruña (CHUAC) Sergas, Department of Cardiology. INIBIC A Coruña. CIBER-CV. Universidad de A Coruña, Spain (2) |
|------------------------|--------------------------|----------|------------------------------------------------------------------------------------------------------------------------------------------------------|

María Dolores Martínez-Ruiz, MD  
 Ruth Pérez-Fernández, MD  
 José J Cuenca-Castillo, MD  
 Xacobe Flores-Ríos, MD  
 Óscar Prada-Delgado, MD  
 Gonzalo Barge-Caballero, MD  
 Miguel Perez Fontan, MD (N)

---

|                  |                  |          |                                                |
|------------------|------------------|----------|------------------------------------------------|
| Vicente Miro, MD | Begoña Igual, MD | Valencia | Hospital Universitario y Politecnico La Fe (1) |
|------------------|------------------|----------|------------------------------------------------|

Jose L Diez, MD  
 Pilar Calvillo, MD  
 Julio Hernandez Jaras, MD (N)

**Argentina (6)**

Lead Country Cardiologist

Luis Guzman, MD

Lead Country Nephrologist

Rafael Maldonado, MD

---

|                   |                    |         |                                     |
|-------------------|--------------------|---------|-------------------------------------|
| Mariano Rubio, MD | Graciela Scaro, MD | Cordoba | Clínica Privada Vélez Sarsfield (5) |
|-------------------|--------------------|---------|-------------------------------------|

Rafael Maldonado, MD (N)

---

|                       |                      |                                 |                        |
|-----------------------|----------------------|---------------------------------|------------------------|
| Julio César Figal, MD | Matías Nicolás Mungo | Ciudad Autónoma de Buenos Aires | Fundación Favaloro (1) |
|-----------------------|----------------------|---------------------------------|------------------------|

Oscar Méndiz, MD  
 Claudia Cortés, MD  
 Roberto René Favalaro, MD  
 Pablo Raf faele, MD (N)

**France (6)**

Lead Country Cardiologist  
 Emmanuel Sorbets, MD, PhD  
 Lead Country Nephrologist  
 Eric Daugas, MD, PhD

|                                                                                                               |                                                                                            |          |                        |
|---------------------------------------------------------------------------------------------------------------|--------------------------------------------------------------------------------------------|----------|------------------------|
| Philippe Gabriel Steg, MD<br>Jean-Michel Juliard, MD<br>Eric Daugas, MD, PhD (N)<br>Emmanuel Sorbets, MD, PhD | Helene Abergel, MSc<br>Axelle Fuentes, MSc                                                 | Paris    | Bichat Hospital (4)    |
| Christophe Thuaire, MD<br>Téodora Dutoiu, MD<br>Catherine Albert, MD (N)<br>Bougrida Hammouche, MD (N)        | Corine Thobois, RN<br>Emilie Tachot, RN<br>Christophe Laure, RN<br>Christel Vassaliere, RN | Chartres | C.H. Louis Pasteur (2) |

**New Zealand (6)**

Lead Country Cardiologist  
 Gerard Patrick Devlin, MD  
 Lead Country Nephrologist  
 Peter Sizeland, MD

|                                                                          |                                                           |          |                      |
|--------------------------------------------------------------------------|-----------------------------------------------------------|----------|----------------------|
| Gerard Patrick Devlin, MD<br>Raewyn Fisher, MD<br>Peter Sizeland, MD (N) | Liz Low, RN<br>Jayne Scales, RN<br>Kirsty Abercrombie, RN | Hamilton | Waikato Hospital (6) |
|--------------------------------------------------------------------------|-----------------------------------------------------------|----------|----------------------|

**United Kingdom (5)**

Lead Country Nephrologist  
 David Wheeler, MD

|                                                                                                                                                                                                                                                                                                                                   |                                                                                                                                                                                                                                                                                     |            |                                                                       |
|-----------------------------------------------------------------------------------------------------------------------------------------------------------------------------------------------------------------------------------------------------------------------------------------------------------------------------------|-------------------------------------------------------------------------------------------------------------------------------------------------------------------------------------------------------------------------------------------------------------------------------------|------------|-----------------------------------------------------------------------|
| Roxy Senior, MBBS, MD, DM<br>Ahmed Elghamaz, MB BCH<br>Sothinathan Gurunathan, MBChB<br>Nikolaos Karogiannis, MBBS<br>Benoy N Shah, MD, MBBS, BSc (Hons)<br>Richard HJ Trimlett, MBBS, CCST<br>Michael B Rubens, LRCP, MRCS, MBBS, DMRD<br>Edward D Nicol, MD, BMedSci, MBBS, DTM&H<br>Tarun K Mittal, MD<br>Neill Duncan, MD (N) | Grace M. Young, MSc, BSc (Hons)<br>Christopher Kinsey<br>Raisa Kav alakkat, MSc, BSc, RN<br>Jo Evans, RN<br>Ikraam Hassan, RN<br>Emma Howard, MSc, BSc<br>Ann Banfield, BSc, RN<br>Reinette Hampson, BSc (Hons), BA (Hons)<br>Rory Collins, BSc<br>Anastasia Vamvakidou, MBBS, MRCP | Harrow     | Northwick Park Hospital Harrow/<br>Royal Brompton Hospital London (2) |
| Reto Andreas Gamma, MBBS<br>Sumith Abeygunasekara, MD (N)                                                                                                                                                                                                                                                                         | Sarah Williams, RN<br>Kim Holland, RN<br>Karen Swan, RN                                                                                                                                                                                                                             | Chelmsford | Broomfield Hospital (1)                                               |
| Khaled Alif akh, MBBS, MD<br>Jonathan Byrne, PhD<br>Ian Webb, PhD, MA (N)                                                                                                                                                                                                                                                         | Abigail Knighton, BSc., PG Dip.<br>Katherine Martin, RGN, Dip. N, MSc                                                                                                                                                                                                               | London     | King's College NHS Foundation Hospital (1)                            |
| Dwayne S. G. Conway, MD                                                                                                                                                                                                                                                                                                           | Judith Wright<br>Donna Exley                                                                                                                                                                                                                                                        | Wakefield  | Pinderfields Hospital (1)                                             |

**Serbia (5)**

Lead Country Cardiologist  
 Branko D. Beleslin, MD, PhD  
 Lead Country Cardiologist

Sanja Simic Ogrizovic, MD

Branko D. Beleslin, MD, PhD

Belgrade

Faculty of Medicine, University of Belgrade;  
Cardiology Clinic, Clinical Center of Serbia (5)

Nikola N. Boskovic, MD  
Marija T. Petrovic, MD  
Milan R. Dobric, MD  
Zeljko Z. Markovic, MD, PhD  
Ana S. Mladenovic, MD, PhD  
Sanja Ogrizovic, MD (N)

Ana D. Djordjevic-Dikic, MD, PhD  
Vojislav L. Giga, MD, PhD  
Jelena J. Stepanovic, MD, PhD

#### Australia (4)

Lead Country Cardiologist

Joseph B. Selvanayagam, MBBS (Hons), DPhil

Lead Country Cardiologist

Magid Fahim, MBChB, FRACP

Joseph B. Selvanayagam,  
MBBS(Hons), DPhil  
Majo X. Joseph, MBBS  
Jonathan M Gleadle, BM Dphil  
(N)

Sau Lee, PhD  
Prince Thomas, RN

Adelaide

Flinders Medical Centre and College of  
Medicine and Public Health (4)

#### Austria (4)

Lead Country Cardiologist

Herwig Schuchlenz

Herwig Schuchlenz, MD  
Stefan Weikl, MD

Gudrun Steinmaurer

Graz

LKH Graz West Austria (3)

Irene Marthe Lang, MD

Max-Paul Winter, MD

Vienna

Medical University of Vienna, Department of  
Cardiology (1)

#### Belgium (4)

Lead Country Nephrologist

Kathleen Claes, MD, PhD

Kaatje Goetschalckx, MD  
Frans Van de Werf, PhD, MD  
Kathleen Claes, MD, PhD (N)

Valerie Robesyn

Leuven

University Hospital Leuven (3)

Christiaan Vrints, MD

Nathalie Brosens

Edegem

Universitair Ziekenhuis Antwerpen (1)

Bharati Shivalkar, MD

Amaryllis Van Craenenbroeck, MD (N)

#### Israel (4)

Yaron Arbel, MD  
Doron Schwartz, MD (N)  
Orit Kliuk, MD

Daniela Puzhevsky  
Miri Revivo

Tel Aviv

Tel Aviv Sourasky Medical Center (4)

#### Egypt (3)

Magdy Abdelhamid, MD  
Ahmed Kamal, MSc  
Hossam Mahrous, MD  
Mohamed Adel, MSc  
Hussien El Fishawy, MD (N)

Ahmed Talaat, MD

Cairo

Cairo University (3)

#### United Arab Emirates (2)

Wael A. Almahmeed, MD  
Mohamed Hassan, MD (N)  
Seema Nour, MD  
Abdallah M. Abdallah, MD  
Salamah Alfalahi, MD

Virendra Misra, MD

Abu Dhabi

Sheikh Khalifa Medical City (2)

**Germany (1)**

Lead Country Cardiologist

Rolf Doerr, MD

Rolf Doerr, MD  
 Gregor Simonis, MD, PhD  
 Juergen Stumpf, MD  
 Clemens T. Kadalie, MD  
 Klaus Matschke, MD, PhD  
 Doreen Reimann, MD (N)

Karin Ploetze, PhD  
 Franziska Guenther  
 Kerstin Bonin  
 Kerstin Mikes, RN  
 Katharina Knaut

Dresden Praxisklinik Herz und Gefaesse (1)

**Macedonia (1)**

Sasko Kedev, MD, PhD  
 Irena Peovska Mitevaska, MD,  
 PhD  
 Elizabeta Srbinovska Kostovska, MD, PhD  
 Hristo Pejkov, MD, PhD  
 Zvezdana Petronijevic, MD (N)  
 Liljana Tozija, MD (N)

Skopje University Clinic of Cardiology (1)

**Netherlands (1)**

Robert K. Riezebos, MD, PhD  
 Pouneh Samadi, MD  
 Elise van Dongen, MD  
 Sander R. Niehe, MD  
 Yves Smets, MD (N)

Jeannette, J. M. Schoep, RN  
 Elisabeth, M. Janzen, RN

Amsterdam Cardio Research Hartcentrum OLVG (1)

**Romania (1)**

Calin Pop, MD, PhD  
 Matei Claudia, MD, PhD  
 Florina Chereches, MD (N)

Bucharest Emergency County Hospital Baia Mare (1)

**Sweden (1)**

Lead Country Cardiologist

Claes Held, MD, PhD

Claes Held, MD, PhD  
 Axel Åkerblom, MD, PhD  
 Inga Soveri, MD, PhD (N)

Christina Björklund, RN  
 Maria Andreasson, RN

Uppsala Uppsala University (1)

\* (N) = Nephrologist
